# Supplementary figures and images for: Critical evaluation of fast and highly resolved elemental distribution in single cells using LA-ICP-SFMS
Source: Royal Society of Chemistry journal article supplement (doi:10.1039/c8ja00096d), 2018-05-22

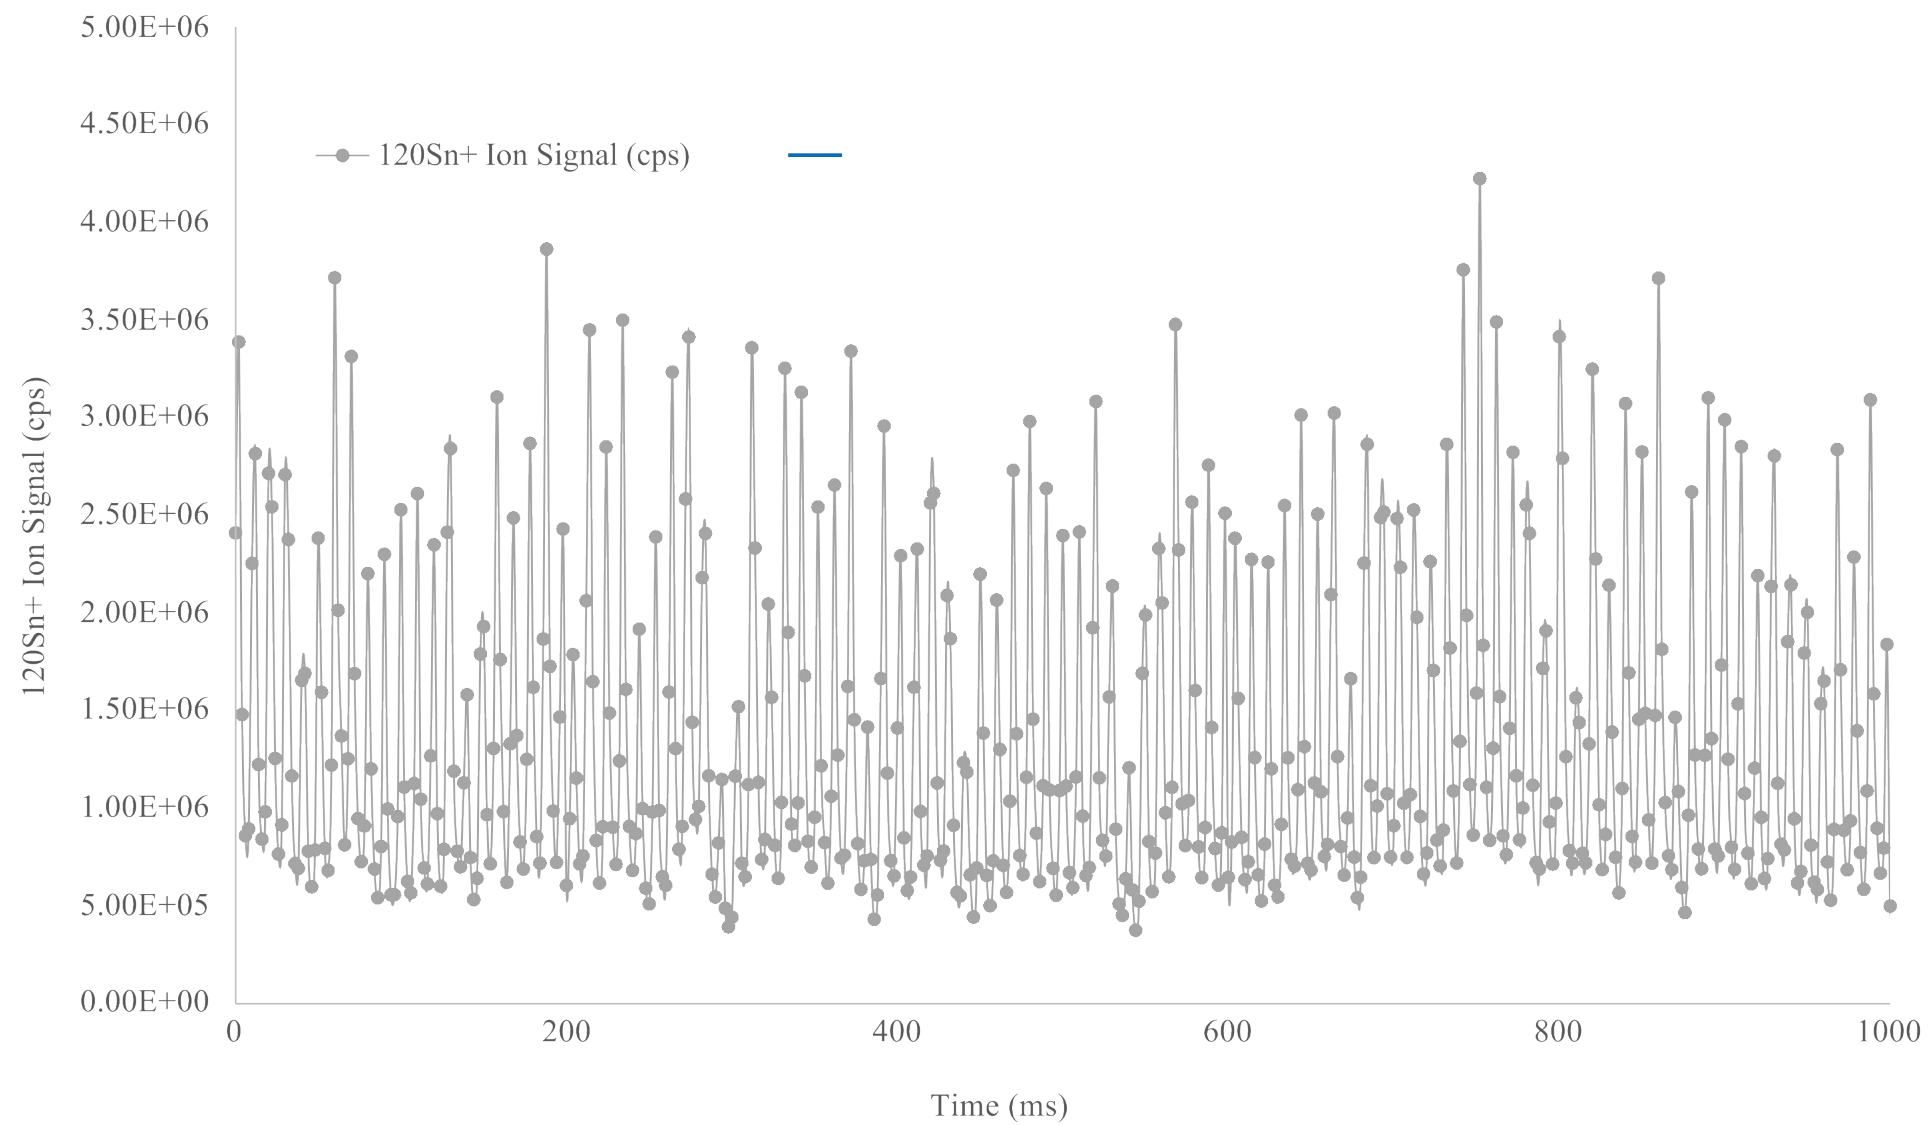

Figure S1

Supplement: c8ja00096d1.pdf [file c8ja00096d1.pdf]
